# Supplementary material
Source: publisher figshare collection journal article supplement (https://acs.figshare.com/ndownloader/files/29060990)
Supplement: Supplementary file 1 [file 29060990]

## Supporting Information

### Engineering Functionality in Organic Porous Networks by Multicomponent Polymerization

Bingyan Zhou,<sup>†</sup> Zixu Chen,<sup>†</sup> Shengyu Feng,<sup>†‡</sup> Dengxu Wang,<sup>\*†‡</sup> Hongzhi Liu<sup>†</sup>

<sup>†</sup> National Engineering Research Center for Colloidal Materials & Key Laboratory of Special Functional Aggregated Materials, Ministry of Education, School of Chemistry and Chemical Engineering, Shandong University, Jinan 250100, P. R. China

<sup>‡</sup> Shandong Key Laboratory of Advanced Organosilicon Materials and Technologies & State Key Laboratory of Fluorinated Functional Membrane Materials, Zibo 256401, P. R. China

\*Corresponding author's e-mail: dxwang@sdu.edu.cn

#### Table of contents

#### Characterization

**Scheme S1.** Plausible mechanism of the Pd-catalyzed multicomponent reaction of bromoarenes, isonitriles and alkynes

**Figure S1.** FT-IR spectroscopy of CPOP and AIPOP-1 to AIPOP-4.

**Figure S2.** <sup>13</sup>C NMR spectra of AIPOP-4 in the solid-state. Asterisks denote the spinning sidebands.

**Figure S3.** Energy dispersive spectroscopy of CPOP (a) and AIPOP-1 to AIPOP-4 (b-e)

**Figure S4.** TGA curves of CPOP and AIPOP-1~AIPOP-4 under N<sub>2</sub> atmosphere with a heating rate of 10°C min<sup>-1</sup>

**Figure S5.** XRD spectra of CPOP and AIPOP-4.

**Figure S6.** SEM images of AIPOP-4 (a), AIPOP-3 (b), AIPOP-2 (c), and AIPOP-1 (d)

**Figure S7.** Colour change of AIPOP-4 after the iodine adsorption

**Figure S8.** Photographs of iodine desorption process of CPOP (a), AIPOP-1 (b), AIPOP-2 (c), AIPOP-3 (d), and AIPOP-4 (e) in ethanol solution from 5 min to 24 h. The same weight iodine loaded samples (20 mg) were immersed in ethanol (4 mL) at room temperature

**Figure S9.** (a) High-resolution XPS spectra of N1s for AIPOP-4 and iodine-loaded AIPOP-4 after desorption with ethanol and *n*-hexane; (b) FT-IR spectra of AIPOP-4 and iodine-loaded AIPOP-4 after desorption with ethanol; (c)  $^{13}\text{C}$  NMR spectra of iodine-loaded AIPOP-4 after desorption with ethanol.

**Figure S10.** Recyclability of AIPOP-4 (the desorption with *n*-hexane) for  $\text{I}_2$  capture

**Figure S11.** Photographs of iodine capture in *n*-hexane solutions by CPOP (a), AIPOP-1 (b), AIPOP-2 (c), AIPOP-3 (d), and AIPOP-4 (e) from 5 min to 24 h. The same weight CPPs (20 mg) were immersed in iodine solutions ( $c = 6 \text{ mM}$ , 5 mL) at  $25^\circ\text{C}$

**Figure S12.** The effect of the initial iodine concentrations on the removal efficiency by AIPOP-4 (1 mg/mL)

**Figure S13.** Mass of AIPOP-4 required for complete removal of different concentrations

**Figure S14.** Wide-scan XPS spectra of iodine-loaded CPOP and AIPOP-4

**Figure S15.** BET plots of CPOP ( $r = 0.999977$ ,  $C = 325.499$ )

**Figure S16.** BET plots of AIPOP-1 ( $r = 0.999968$ ,  $C = 199.189$ )

**Figure S17.** BET plots of AIPOP-2 ( $r = 0.999962$ ,  $C = 172.029$ )

**Figure S18.** BET plots of AIPOP-3 ( $r = 0.999924$ ,  $C = 25.726$ )

**Figure S19.** BET plots of AIPOP-4 ( $r = 0.999908$ ,  $C = 36.885$ )

**Table S1.** Experimental data of AIPOPs and CPOP

**Table S2.** EDS analysis data for CPOP and AIPOP-1 to AIPOP-4

**Table S3.** Porosity data of CPOP and AIPOP-1 to AIPOP-4

**Table S4.** Kinetic parameters for the adsorption of I<sub>2</sub> by AIPOP-4

**Table S5.** Kinetic parameters for the adsorption of iodine solution by AIPOP-4

**Table S6.** Summary of the Langmuir and Freundlich isotherm model parameters for the adsorption of iodine solution by AIPOP-4

**Table S7.** Electronic binding energy of various elements in iodine-loaded CPOP and AIPOP-4

**Characterization.** Fourier transform infrared (FT-IR) spectra were measured within a 4000 to 400 cm<sup>-1</sup> region on a Bruker TENSOR-27 infrared spectrophotometer (KBr pellet). <sup>1</sup>H NMR, <sup>13</sup>C NMR and <sup>29</sup>Si NMR spectra were measured on a Bruker AVANCE-300 or 400 NMR spectrometer. Solid-state <sup>13</sup>C cross-polarization/magic-angle-spinning (CP/MAS) NMR data was collected on Bruker AVANCE-500 NMR Spectrometer operating at a magnetic field strength of 9.4 T. The resonance frequencies at this field strength were 125 MHz for <sup>13</sup>C NMR respectively. A chemagnetics 5 mm triple- resonance MAS probe was used to acquire <sup>13</sup>C NMR spectra. Elemental analyses were measured using an Elementar Vario EL III elemental analyzer and Oxford INCA X-sight energy dispersive X-ray spectrometry.

Thermogravimetric analysis (TGA) was conducted under N<sub>2</sub> using a TA SDTQ600 at a temperature range of room temperature to 800°C with a heating rate of 10 °C min<sup>-1</sup>. Field-emission scanning electron microscopy (FE-SEM) experiments were determined by using HITACHI S4800 Spectrometer. Powder X-ray diffraction (PXRD) were carried out on a Rigaku D/MAX 2550 diffractometer with Cu-Kα radiation, 40 kV, 20 mA with the 2θ range of 10°~90° (scanning rate of 10° min<sup>-1</sup>) at

room temperature. Nitrogen sorption isotherm measurements were performed using a Micro meristics surface area and a pore size analyzer. Before measurement, the samples were degassed at 100°C for at least 12 h. A sample of ca. 100 mg and a UHP-grade nitrogen (99.999%) gas source were used for the nitrogen sorption measurements conducted at 77K and collected on a Quantachrome Quadrasorb apparatus. Brunauer-Emmett-Teller (BET) surface areas were determined over a  $P/P_0$  range from 0.01 to 0.20. Nonlocal density functional theory (NLDFT) pore size distributions were determined using the carbon/slit cylindrical pore mode of the Quadrawin software. X-ray photoelectron spectroscopy (XPS) was conducted on a Thermo Fischer ESCALAB 250Xi using a monochromatic Al K $\alpha$  (1486.8 eV) X-ray source with a spot size of 500  $\mu\text{m}$ . The anode was operated at 12.5 kV and 16 mA. Raman spectra were collected by using a micro-Raman LabRAM HR800 spectrometer (Horiba Jobin Yvon, Japan) equipped with a 633 nm laser as an excitation source. Ultraviolet absorption (UV) spectra were performed with TU-1901 double UV–Vis spectrophotometer.

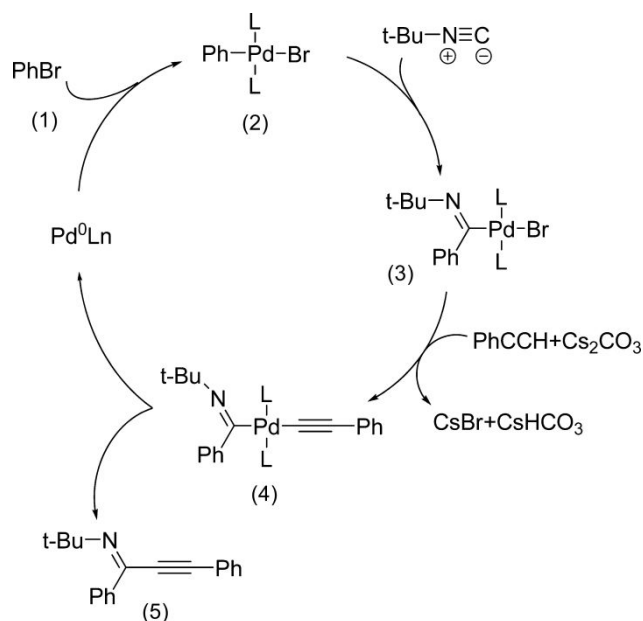

**Scheme S1.** Plausible mechanism of the Pd-catalyzed multicomponent reaction of bromoarenes, isonitriles and alkynes

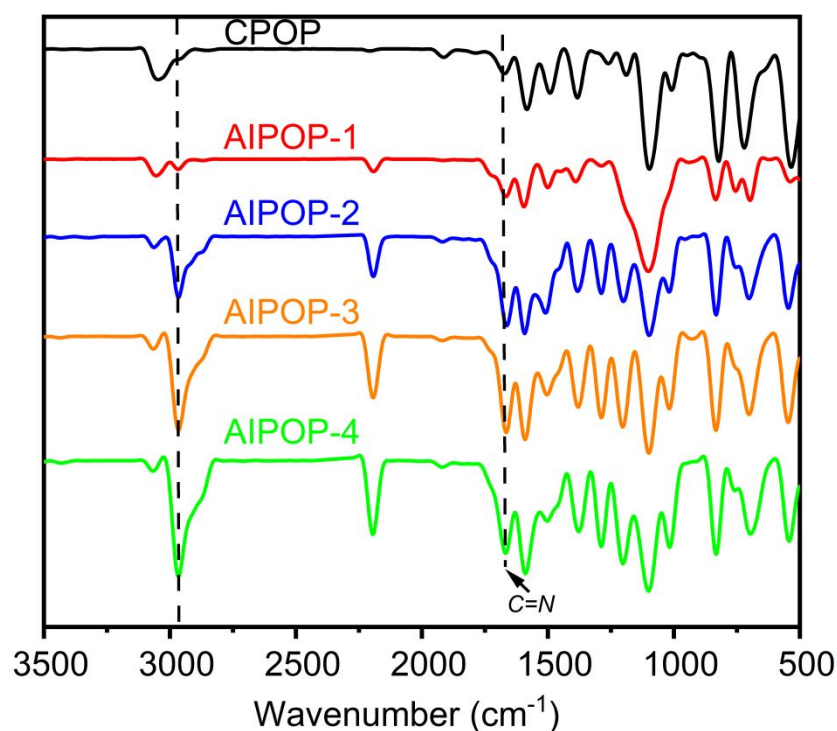

**Figure S1.** FT-IR spectroscopy of CPOP and AIPOP-1 to AIPOP-4. The peaks at  $1665\text{ cm}^{-1}$  in AIPOPs are assigned to both C=C and C=N stretching vibrations, while this peak in CPOP belongs to the C=C stretching vibration. This assignment could be evidenced by the gradually enhanced absorption intensities of C=N peaks with an increment of imine contents in AIPOPs.

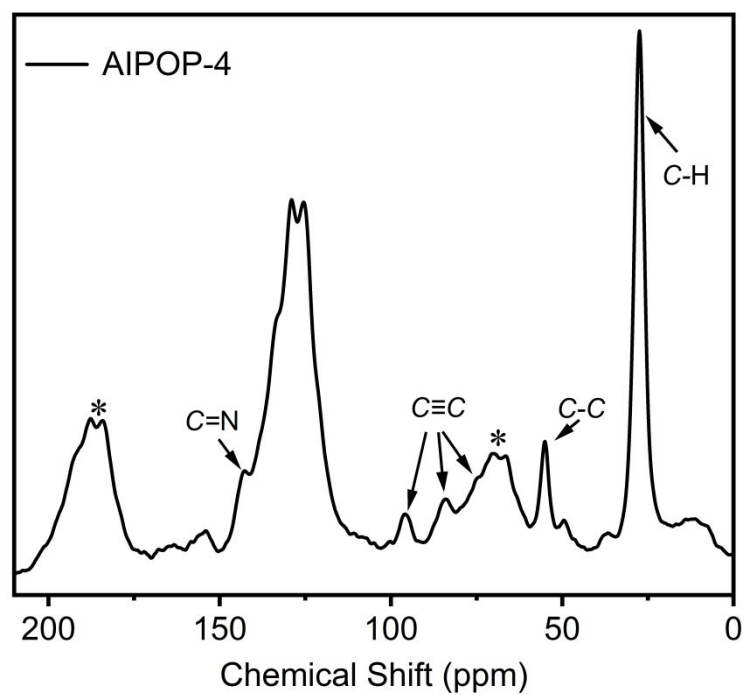

**Figure S2.**  $^{13}\text{C}$  NMR spectra of AIPOP-4 in the solid-state. Asterisks denote the spinning sidebands.

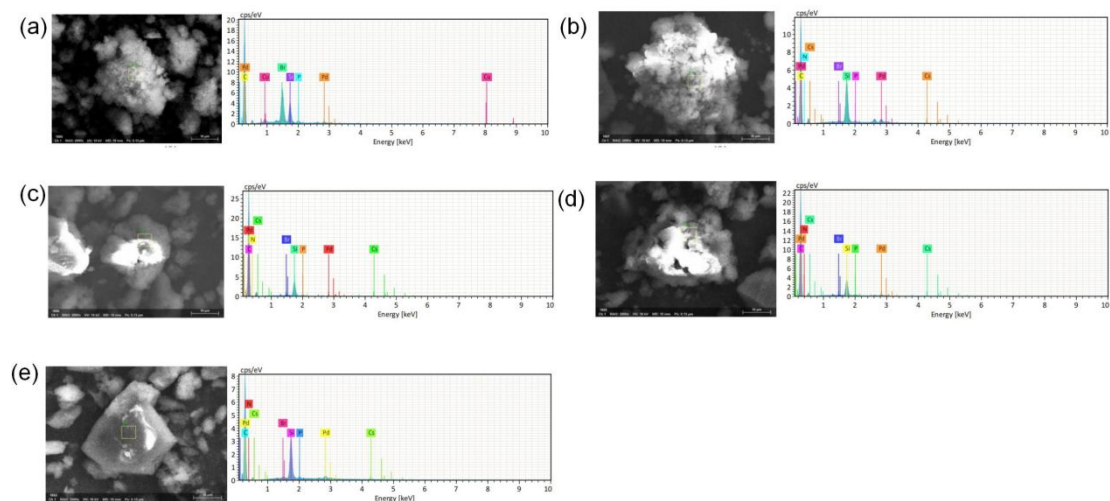

**Figure S3.** Energy dispersive spectroscopy of CPOP (a) and AIPOP-1 to AIPOP-4 (b-e)

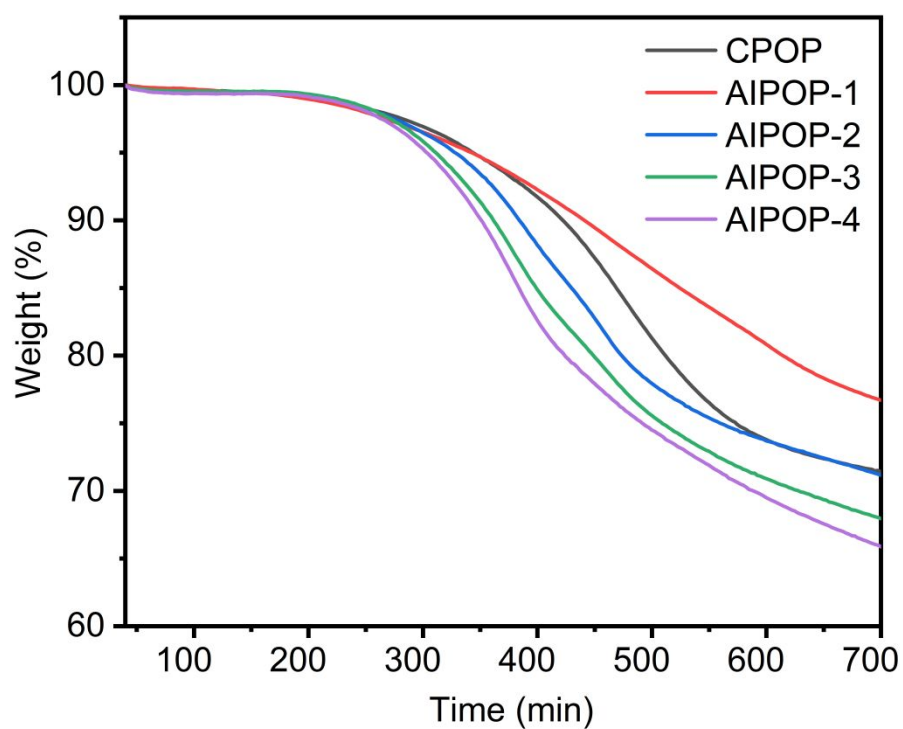

**Figure S4.** TGA curve of CPOP and AIPOP-1~AIPOP-4 under N<sub>2</sub> atmosphere with a heating rate of 10°C min<sup>-1</sup>

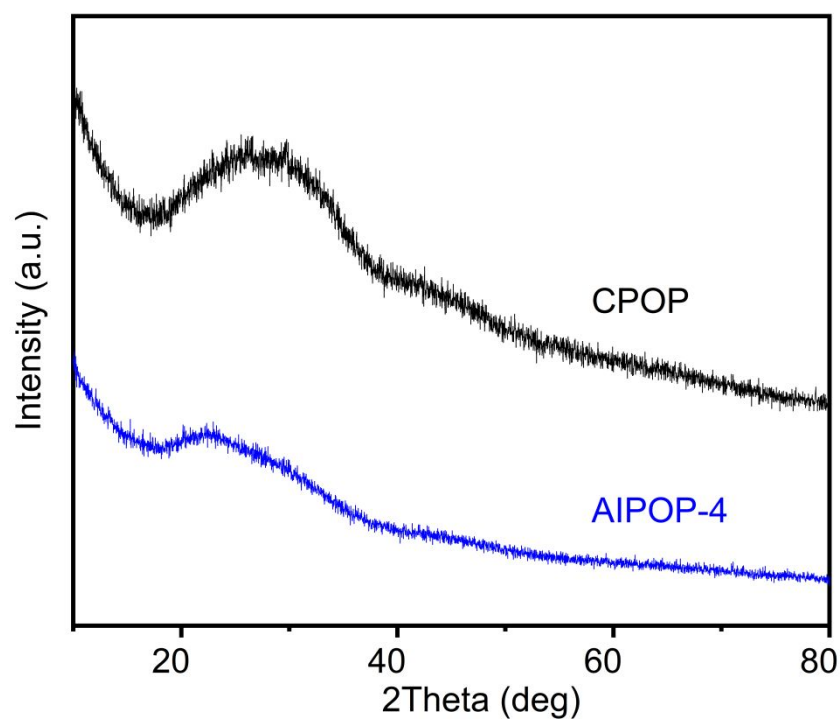

**Figure S5.** XRD spectra of CPOP and AIPOP-4.

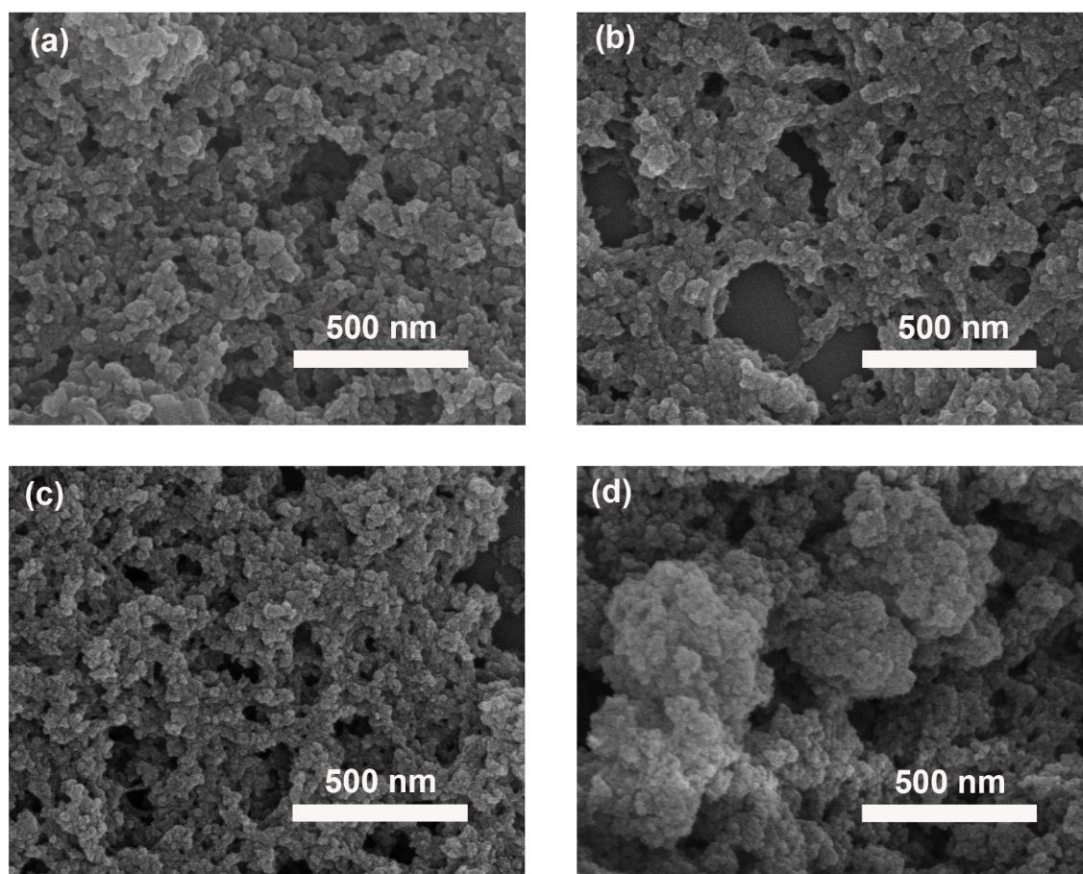

**Figure S6.** SEM images of AIPOP-4 (a), AIPOP-3 (b), AIPOP-2 (c), and AIPOP-1 (d)

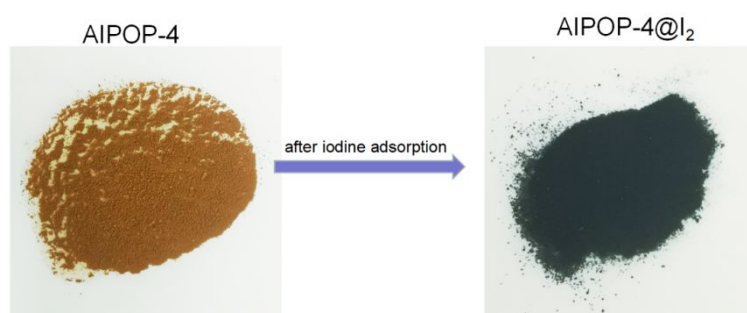

**Figure S7.** Colour change of AIPOP-4 after the iodine adsorption



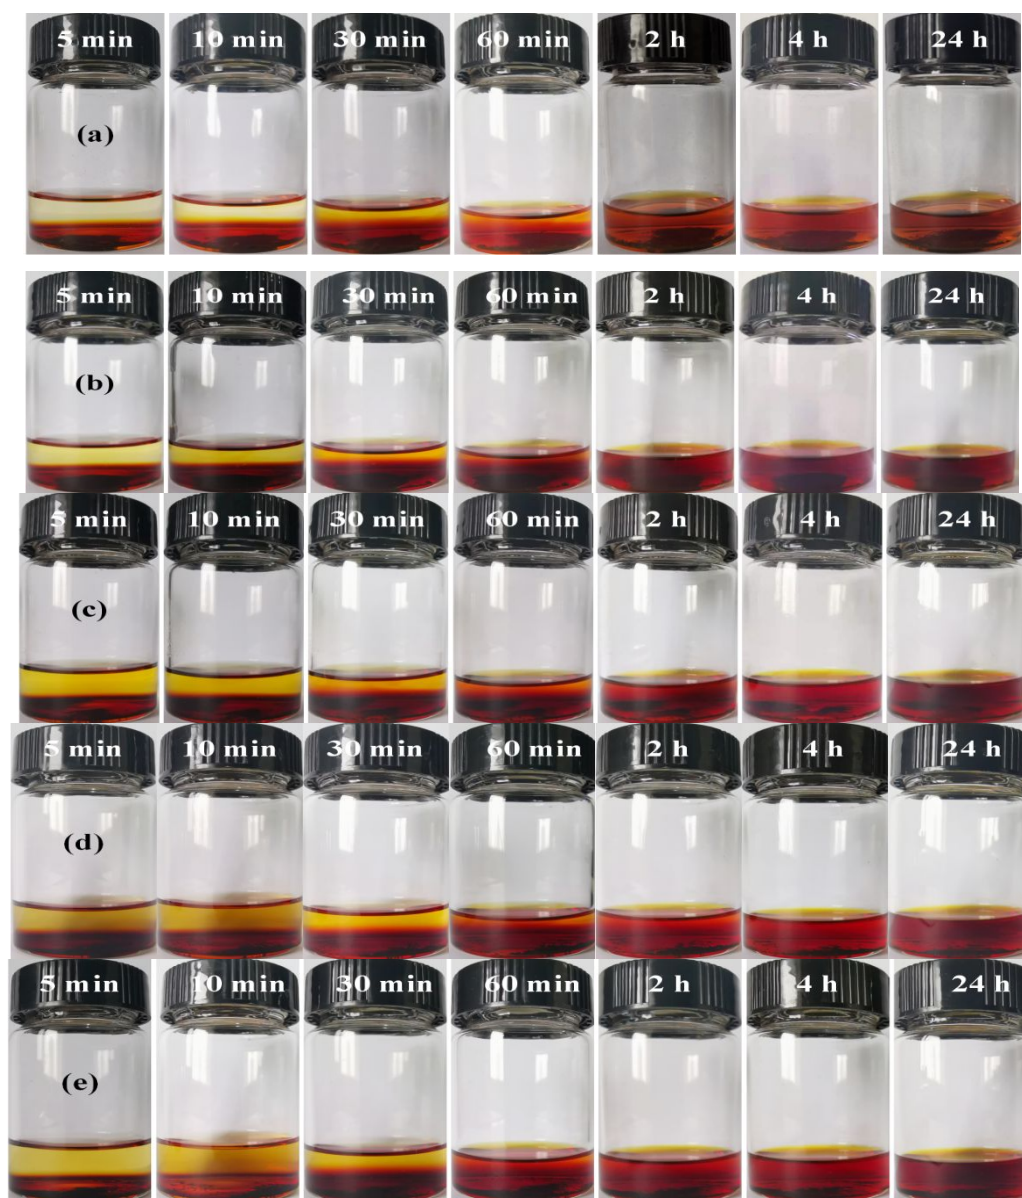

**Figure S8.** Photographs of iodine desorption process of CPOP (a), AIPOP-1 (b), AIPOP-2 (c), AIPOP-3 (d), and AIPOP-4 (e) in ethanol from 5 min to 24 h. The same weight iodine loaded samples (20 mg) were immersed in ethanol (4 mL) at room temperature

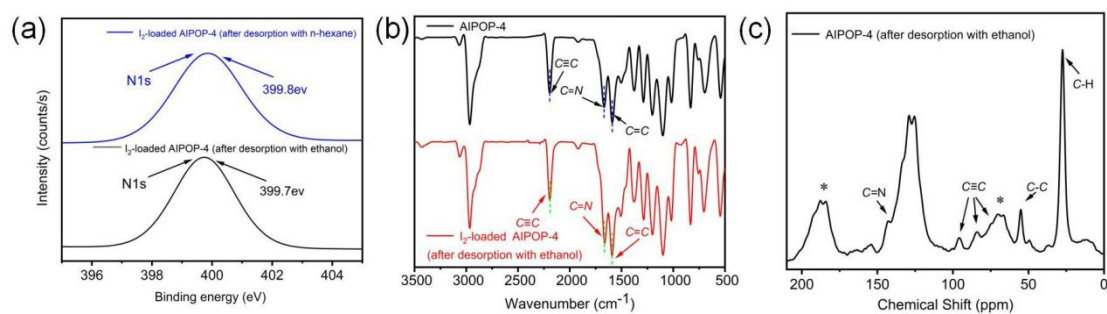

**Figure S9.** (a) High-resolution XPS spectra of N1s for AIPOP-4 and iodine-loaded AIPOP-4 after desorption with ethanol and *n*-hexane; (b) FT-IR spectra of AIPOP-4 and iodine-loaded AIPOP-4 after desorption with ethanol; (c) <sup>13</sup>C NMR spectra of iodine-loaded AIPOP-4 after desorption with ethanol.

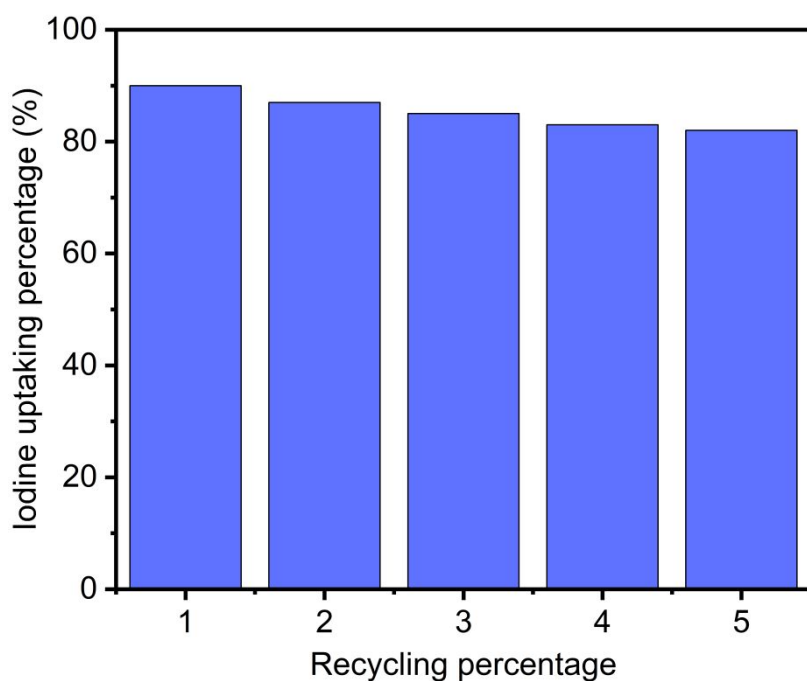

**Figure S10.** Recyclability of AIPOP-4 (after desorption with *n*-hexane) for I<sub>2</sub> capture

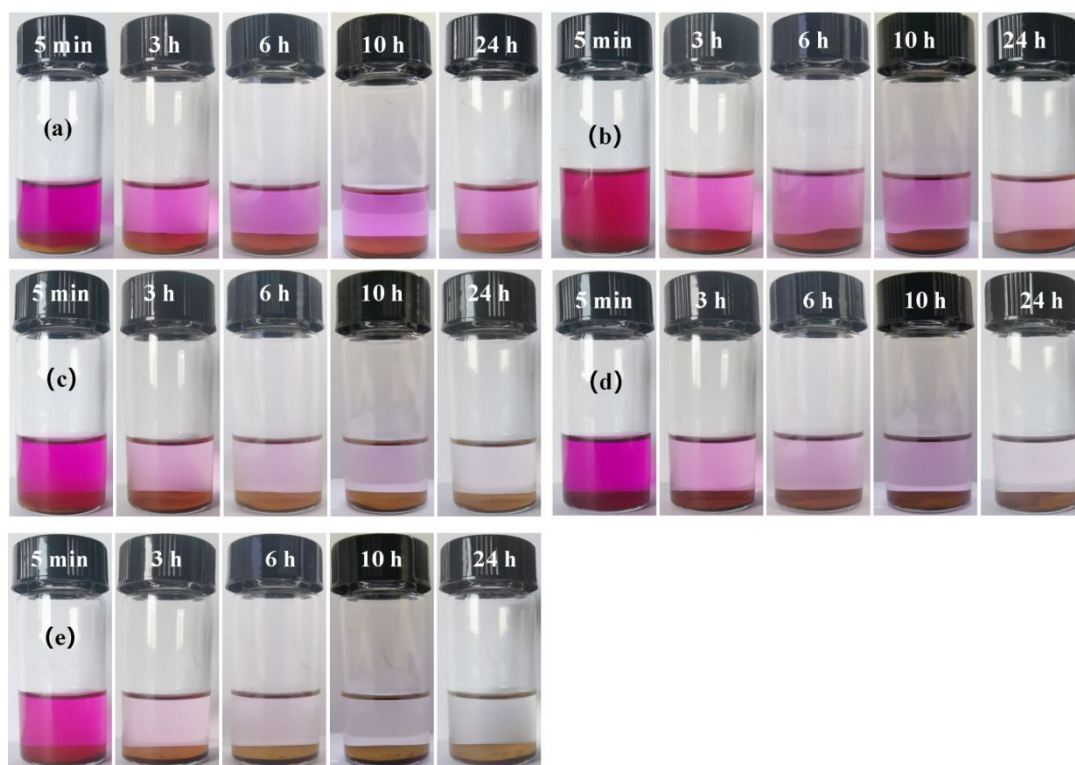

**Figure S11.** Photographs of iodine capture in n-hexane solutions by CPOP (a), AIPOP-1 (b), AIPOP-2 (c), AIPOP-3 (d), and AIPOP-4 (e) from 5 min to 24 h. The same weight CPPs (20 mg) were immersed in iodine solutions ( $c = 6 \text{ mM}$ , 5 mL) at  $25^\circ\text{C}$ .

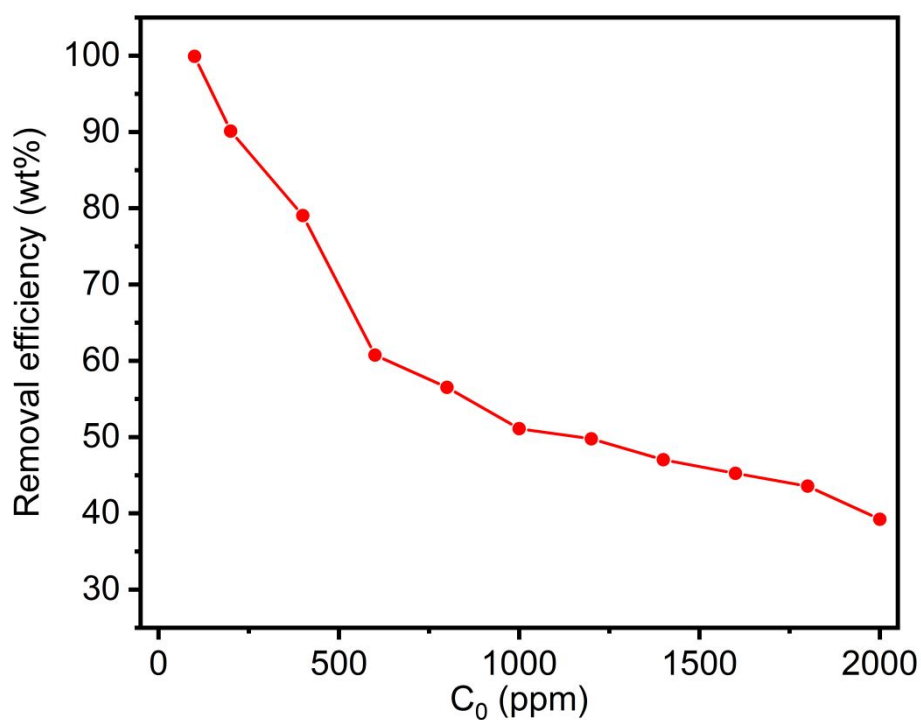

**Figure S12.** The effect of the initial iodine concentrations on the removal efficiency by AIPOP-4 (1 mg/mL)

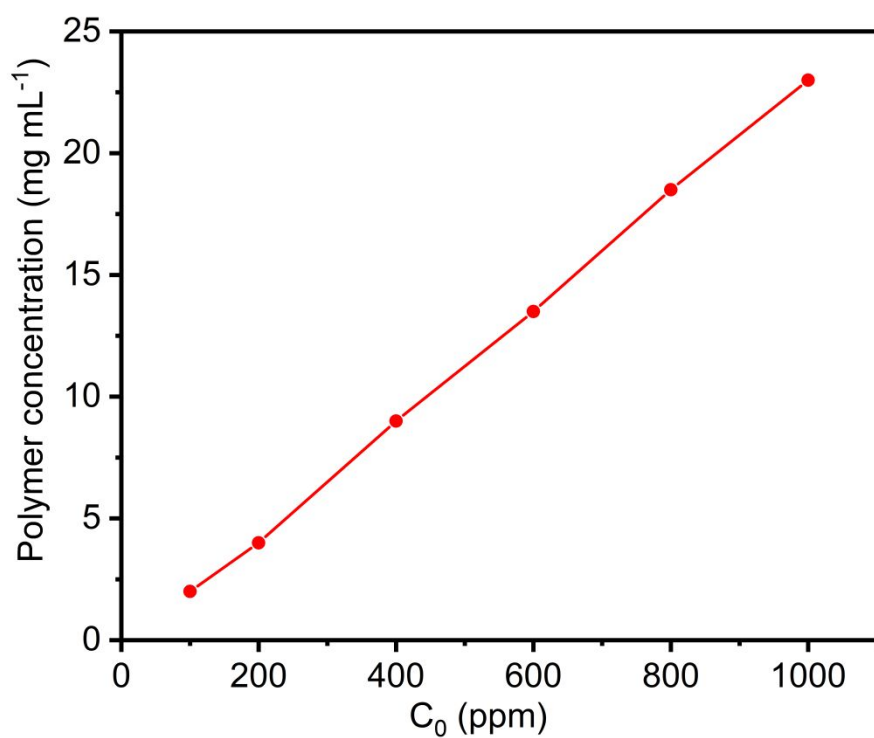

**Figure S13.** Mass of AIPOP-4 required for complete removal of iodine in different concentrations

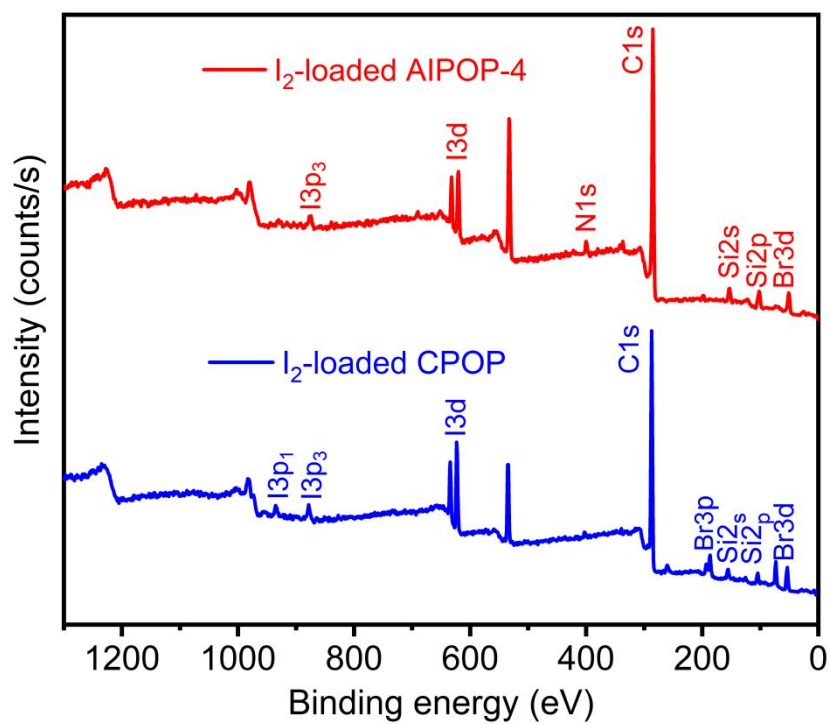

**Figure S14.** Wide-scan XPS spectra of iodine-loaded CPOP and AIPOP-4;

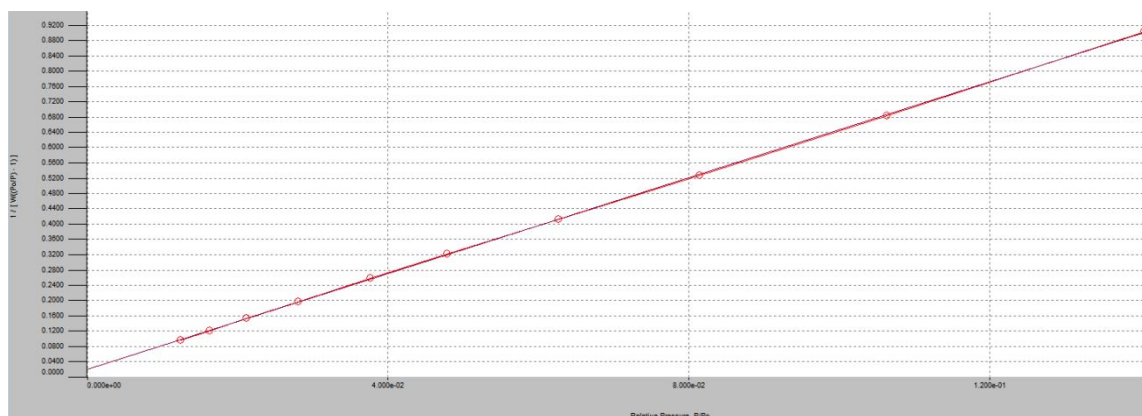

**Figure S15.** BET plots of CPOP ( $r = 0.999977$ ,  $C = 325.499$ )

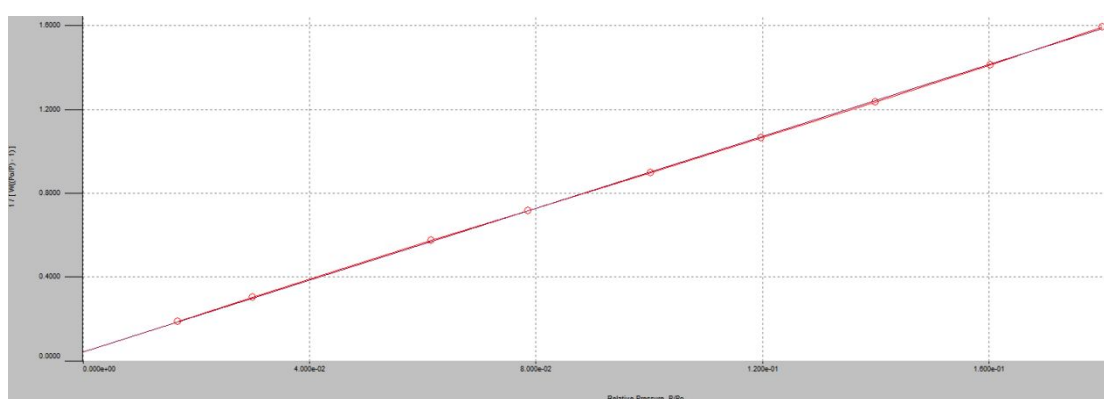

**Figure S16.** BET plots of AIPOP-1 ( $r = 0.999968$ ,  $C = 199.189$ )

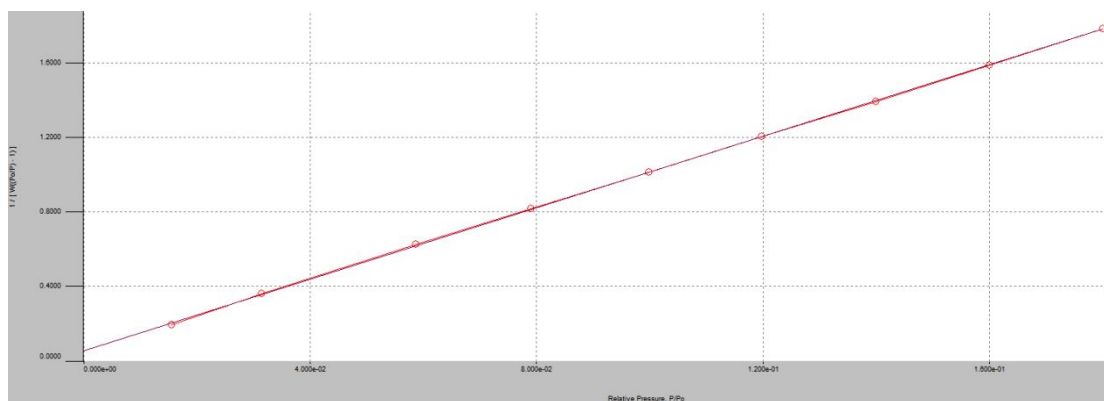

**Figure S17.** BET plots of AIPOP-2 ( $r = 0.999962$ ,  $C = 172.029$ )

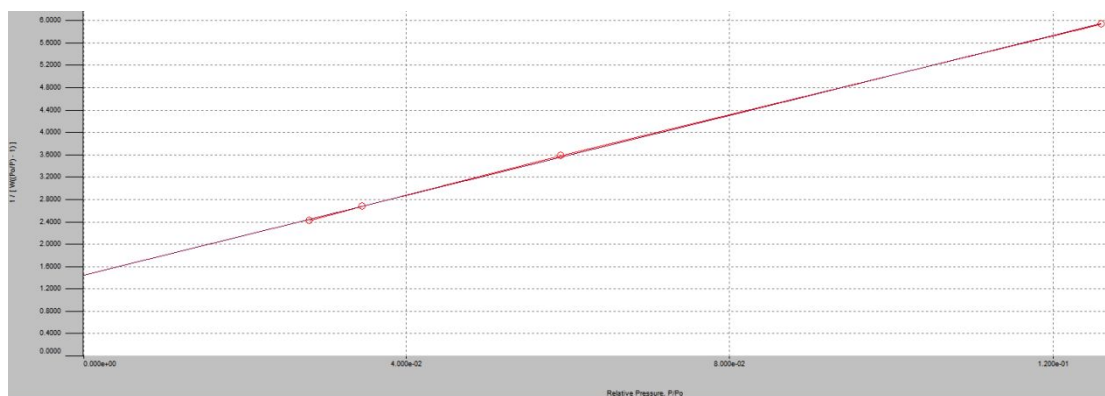

**Figure S18.** BET plots of AIPOP-3 ( $r = 0.999924$ ,  $C = 25.726$ )

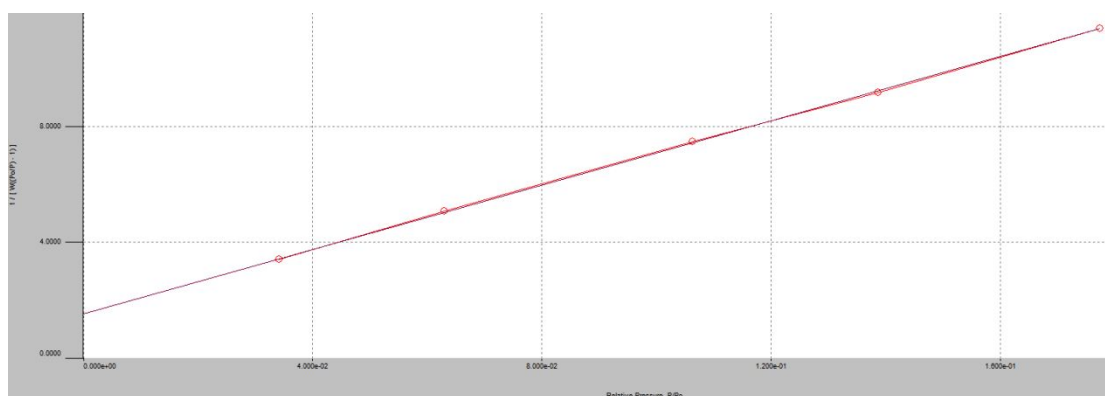

**Figure S19.** BET plots of AIPOP-4 ( $r = 0.999908$ ,  $C = 36.885$ )

**Table S1.** Experimental data of AIPOPs and CPOP

| Polymers | M-1<br>(mol) | M-2<br>(mol) | M-3<br>(mol) | C<br>(%) | H<br>(%) | N<br>(%) | $S_{\text{BET}}$<br>( $\text{m}^2 \text{g}^{-1}$ ) | $V_{\text{total}}$<br>( $\text{cm}^3 \text{g}^{-1}$ ) | Iodine<br>uptake<br>( $\text{g g}^{-1}$ ) | Yield<br>(%) |
|----------|--------------|--------------|--------------|----------|----------|----------|----------------------------------------------------|-------------------------------------------------------|-------------------------------------------|--------------|
| AIPOP-1  | 1            | 2            | 0.8          | 73.6     | 4.69     | 1.38     | 405                                                | 1.21                                                  | 1.73                                      | 75.4         |
| AIPOP-2  | 1            | 2            | 2.0          | 73.7     | 5.36     | 3.72     | 361                                                | 1.07                                                  | 2.65                                      | 73.3         |
| AIPOP-3  | 1            | 2            | 2.8          | 74.8     | 5.70     | 4.57     | 97                                                 | 0.51                                                  | 3.25                                      | 72.8         |
| AIPOP-4  | 1            | 2            | 4.0          | 74.2     | 6.00     | 5.75     | 61                                                 | 0.42                                                  | 4.10                                      | 88           |



|      |   |   |   |      |      |   |     |      |      |    |
|------|---|---|---|------|------|---|-----|------|------|----|
| CPOP | 1 | 2 | 0 | 75.4 | 4.41 | 0 | 554 | 2.44 | 1.15 | 85 |
|------|---|---|---|------|------|---|-----|------|------|----|

**Table S2.** EDS analysis data for CPOP and AIPOP-1 to AIPOP-4

|         | C     |       | N    |      | Si    |       | P    |      |
|---------|-------|-------|------|------|-------|-------|------|------|
|         | Mass  | Atom  | Mass | Atom | Mass  | Atom  | Mass | Atom |
|         | (%)   | (%)   | (%)  | (%)  | (%)   | (%)   | (%)  | (%)  |
| AIPOP-4 | 63.74 | 82.14 | 5.73 | 4.64 | 21.97 | 12.11 | 0.82 | 0.41 |
| AIPOP-3 | 76.19 | 88.81 | 3.43 | 3.43 | 13.19 | 6.58  | 3.71 | 0.49 |
| AIPOP-2 | 77.98 | 90.03 | 2.85 | 2.83 | 12.06 | 5.96  | 0.85 | 0.38 |
| AIPOP-1 | 66.36 | 84.42 | 1.11 | 1.21 | 23.42 | 12.74 | 0.92 | 0.45 |
| CPOP    | 61.89 | 97.63 | -    | -    | 9.81  | 5.94  | 1.14 | 0.62 |

  

|         | Br    |      | Pd   |      | Cs   |      | Cu   |      |
|---------|-------|------|------|------|------|------|------|------|
|         | Mass  | Atom | Mass | Atom | Mass | Atom | Mass | Atom |
|         | (%)   | (%)  | (%)  | (%)  | (%)  | (%)  | (%)  | (%)  |
| AIPOP-4 | 1.06  | 0.2  | 4.51 | 0.66 | 3.17 | 0.37 | -    | -    |
| AIPOP-3 | 0.69  | 0.12 | 3.71 | 0.49 | 1.97 | 0.21 | -    | -    |
| AIPOP-2 | 1.56  | 0.27 | 1.57 | 0.2  | 3.14 | 0.33 | -    | -    |
| AIPOP-1 | 0.58  | 0.11 | 6.78 | 0.97 | 0.83 | 0.1  | -    | -    |
| CPOP    | 22.81 | 4.85 | 1.95 | 0.31 | -    | -    | 2.41 | 0.65 |

**Table S3.** Porosity data of CPOP and AIPOP-1~AIPOP-4.

| Polymers | $S_{\text{BET}}$<br>( $\text{m}^2\text{g}^{-1}$ ) <sup>[a]</sup> | $S_{\text{micro}}$<br>( $\text{m}^2\text{g}^{-1}$ ) <sup>[b]</sup> | $V_{\text{total}}$<br>( $\text{cm}^3\text{g}^{-1}$ ) <sup>[c]</sup> | $V_{\text{micro}}$<br>( $\text{cm}^3\text{g}^{-1}$ ) <sup>[d]</sup> | $V_{\text{micro}}/V_{\text{total}}$ |
|----------|------------------------------------------------------------------|--------------------------------------------------------------------|---------------------------------------------------------------------|---------------------------------------------------------------------|-------------------------------------|
| CPOP     | 554                                                              | 360.1                                                              | 2.44                                                                | 0.146                                                               | 0.060                               |
| AIPOP-1  | 405                                                              | 190.3                                                              | 1.21                                                                | 0.069                                                               | 0.057                               |
| AIPOP-2  | 361                                                              | 130.1                                                              | 1.07                                                                | 0.040                                                               | 0.037                               |
| AIPOP-3  | 97                                                               | 0                                                                  | 0.51                                                                | 0                                                                   | 0                                   |
| AIPOP-4  | 61                                                               | 0                                                                  | 0.42                                                                | 0                                                                   | 0                                   |

[a] Surface area calculated from  $\text{N}_2$  adsorption isotherm using the BET method; [b] Microporous surface area calculated from  $\text{N}_2$  adsorption isotherm using t-plot method; [c] Total pore volume calculated at  $P/P_0 = 0.99$ ; [d] Micropore volume derived using the t-plot method based on the de-Boer thickness equation.

**Table S4.** Kinetic parameters for the  $\text{I}_2$  adsorption by AIPOP-4

| Model | Parameters                             |
|-------|----------------------------------------|
|       | $Q_{\text{exp}}$ ( $\text{g g}^{-1}$ ) |
|       | 4.1                                    |

|                     |                           |         |
|---------------------|---------------------------|---------|
| Pseudo-first order  | $Q_{e,cal} (g\ g^{-1})$   | 2.621   |
|                     | $K_1 (g\ g^{-1}\ h^{-1})$ | 0.25543 |
|                     | $R^2$                     | 0.9718  |
| Pseudo-second order | $Q_{e,cal} (g\ g^{-1})$   | 4.162   |
|                     | $K_2 (h^{-1})$            | 0.2329  |
|                     | $R^2$                     | 0.9941  |

**Table S5.** Kinetic parameters for the I<sub>2</sub> adsorption in *n*-hexane solution by AIPOP-4

| Modal               | Parameters                |         |
|---------------------|---------------------------|---------|
| Pseudo-first order  | $Q_{e,cal} (g\ g^{-1})$   | 0.24734 |
|                     | $K_1 (g\ g^{-1}\ h^{-1})$ | 0.04712 |
|                     | $R^2$                     | 0.98157 |
| Pseudo-second order | $Q_{e,cal} (g\ g^{-1})$   | 0.2922  |
|                     | $K_2 (h^{-1})$            | 0.968   |
|                     | $R^2$                     | 0.99102 |

**Table S6.** Summary of the Langmuir and Freundlich isotherm model parameters for the adsorption of iodine in *n*-hexane solution on the AIPOP-4

| Langmuir constants |                  |         | Freundlich constants |       |         |
|--------------------|------------------|---------|----------------------|-------|---------|
| $Q_m(g\ g^{-1})$   | $K_L(L\ g^{-1})$ | $R_L^2$ | $K_F(L\ g^{-1})$     | $1/n$ | $R_F^2$ |
| 0.7874             | 1.72             | 0.9810  | $3.873 \times 10^4$  | 0.37  | 0.9924  |

**Table S7.** Electronic binding energy of various elements in iodine-loaded CPOP and AIPOP-4

| Sample  | I3p <sub>1</sub> | I3p <sub>3</sub>  | I3d <sub>3</sub>  | I3d <sub>5</sub> | N1s    | C1s    |       |
|---------|------------------|-------------------|-------------------|------------------|--------|--------|-------|
| AIPOP-4 | -                | 875.17            | 631.81            | 620.36           | 399.55 | 284.80 |       |
| CPop    | 932.50           | 875.67            | 631.52            | 620.02           | 399.81 | 284.80 |       |
|         | Br3s             | Br3p <sub>1</sub> | Br3p <sub>3</sub> | Si2s             | Si2p   | Br3d   | I4d   |
| AIPOP-4 | -                | -                 | -                 | 152.98           | 101.81 | -      | 50.28 |
| CPop    | 257.63           | 190.93            | 183.79            | 153.29           | 102.17 | 70.91  | 51.14 |
